# Supplementary material for: In Vitro Killing Activities of Anidulafungin and Micafungin with and without Nikkomycin Z against Four Candida auris Clades
Source: MDPI journal article supplement (doi:10.3390/pharmaceutics15051365), 2023-04-29
Supplement: s1 [file s1]

**Supplemental Table S1.** Time (hours) to reach 99.9% growth reduction ( $T_{99.9}=3/k$ ) from the starting inocula at different anidulafungin and anidulafungin plus 8 mg/L nikkomycin Z concentrations in RPMI-1640 against 4 *Candida auris* clades. **Measurable growth reduction times are shaded.**

Type strain: NCPF 13029=CBS 10913. GR: growth occurred. NA: 99.9% growth inhibition not achieved.

| Clade                          | Isolate number | $T_{99.9}$           |    |    |    |      |                                          |     |     |      |      |
|--------------------------------|----------------|----------------------|----|----|----|------|------------------------------------------|-----|-----|------|------|
|                                |                | Anidulafungin (mg/L) |    |    |    |      | Anidulafungin (mg/L)+nikkomycin Z (mg/L) |     |     |      |      |
|                                |                | 0.25                 | 1  | 8  | 16 | 32   | 0.25+8                                   | 1+8 | 8+8 | 16+8 | 32+8 |
| South Asian                    | 20             | GR                   | GR | NA | NA | NA   | NA                                       | NA  | NA  | NA   | NA   |
|                                | 27             | GR                   | NA | NA | NA | NA   | NA                                       | NA  | 5.8 | 3.9  | 2.6  |
|                                | 28             | GR                   | GR | GR | GR | GR   | GR                                       | GR  | GR  | GR   | GR   |
|                                | 196            | NA                   | NA | NA | NA | NA   | NA                                       | 8.7 | 6.5 | 5.3  | 4.7  |
|                                | 208            | GR                   | GR | GR | GR | GR   | GR                                       | GR  | GR  | GR   | NA   |
| East Asian                     | Type strain    | NA                   | NA | NA | NA | 3.04 | NA                                       | NA  | NA  | 2.9  | 1.7  |
|                                | 12372          | NA                   | NA | NA | NA | NA   | NA                                       | NA  | 4.1 | 4.1  | 2.9  |
|                                | 12373          | NA                   | NA | NA | NA | NA   | NA                                       | NA  | 4.1 | 2.6  | 2.7  |
| South African                  | 2              | GR                   | GR | GR | GR | GR   | NA                                       | NA  | NA  | NA   | NA   |
|                                | 204            | GR                   | GR | GR | GR | GR   | NA                                       | NA  | NA  | NA   | NA   |
|                                | 206            | GR                   | GR | GR | GR | GR   | GR                                       | GR  | GR  | GR   | GR   |
| South American (from Israel)   | I-24           | GR                   | GR | NA | NA | NA   | GR                                       | GR  | NA  | NA   | NA   |
|                                | I-156          | GR                   | GR | GR | GR | GR   | NA                                       | NA  | NA  | NA   | NA   |
| South American (from Colombia) | 13108          | NA                   | NA | NA | NA | NA   | 9.7                                      | 7.7 | 5.2 | 5.4  | 4.0  |
|                                | 16565          | NA                   | NA | NA | NA | NA   | 6.7                                      | 8.3 | 5.6 | 3.95 | 4.6  |
