# Supplementary material for: In Vitro Killing Activities of Anidulafungin and Micafungin with and without Nikkomycin Z against Four Candida auris Clades
Source: MDPI journal article supplement (doi:10.3390/pharmaceutics15051365), 2023-04-29
Supplement: s1 [file s1]

**Supplemental Table S2.** Time (hours) to reach 99.9% growth reduction ( $T_{99.9}=3/k$ ) from the starting inocula at different micafungin and micafungin plus 8 mg/L nikkomycin Z concentrations in RPMI-1640 against 4 *Candida auris* clades. **Measurable growth reduction times are shaded.**

Type strain: NCPF 13029=CBS 10913. GR: growth occurred. NA: 99.9% growth inhibition not achieved;

| Clade                          | Isolate number | T <sub>99.9</sub> (hours) |    |    |    |    |                                        |      |      |      |      |
|--------------------------------|----------------|---------------------------|----|----|----|----|----------------------------------------|------|------|------|------|
|                                |                | Micafungin (mg/L)         |    |    |    |    | Micafungin (mg/L) +nikkomycin Z (mg/L) |      |      |      |      |
|                                |                | 0.25                      | 1  | 8  | 16 | 32 | 0.25+8                                 | 1+8  | 8+8  | 16+8 | 32+8 |
| South Asian                    | 20             | GR                        | GR | GR | GR | GR | NA                                     | NA   | NA   | NA   | NA   |
|                                | 27             | NA                        | NA | NA | NA | NA | NA                                     | NA   | NA   | NA   | 18.1 |
|                                | 28             | GR                        | GR | GR | GR | GR | GR                                     | GR   | GR   | GR   | GR   |
|                                | 196            | NA                        | NA | NA | NA | NA | NA                                     | NA   | NA   | NA   | NA   |
|                                | 208            | GR                        | GR | GR | GR | GR | GR                                     | GR   | GR   | GR   | GR   |
| East Asian                     | Type strain    | NA                        | NA | NA | NA | NA | NA                                     | NA   | NA   | NA   | NA   |
|                                | 12372          | NA                        | NA | NA | NA | NA | NA                                     | NA   | NA   | NA   | 23.7 |
|                                | 12373          | NA                        | NA | NA | NA | NA | NA                                     | NA   | NA   | NA   | NA   |
| South African                  | 2              | GR                        | GR | GR | GR | GR | NA                                     | NA   | NA   | NA   | NA   |
|                                | 204            | GR                        | GR | GR | GR | GR | NA                                     | NA   | NA   | NA   | NA   |
|                                | 206            | GR                        | GR | GR | GR | GR | GR                                     | GR   | NA   | GR   | GR   |
| South American (from Israel)   | I-24           | GR                        | GR | GR | GR | GR | NA                                     | NA   | NA   | NA   | NA   |
|                                | I-156          | GR                        | GR | GR | GR | GR | NA                                     | NA   | NA   | NA   | NA   |
| South American (from Colombia) | 13108          | NA                        | NA | NA | NA | NA | 11.0                                   | 14.5 | 12.4 | 13.5 | 12.2 |
|                                | 16565          | NA                        | NA | NA | NA | NA | 11.2                                   | 12.3 | 17.4 | 12.5 | 19.1 |
